# Supplementary material
Source: PubMed Central journal article supplement (PMC5787035)
Supplement: NIHMS926004-supplement-1.pdf [file NIHMS926004-supplement-1.pdf]

mol % of sample from 3 independent experiments are shown

| CLASS          | wildtype_rich_1 | wildtype_rich_2 | wildtype_rich_3 | wildtype poor_1 | wildtype poor_2 | wildtype poor_3 |
|----------------|-----------------|-----------------|-----------------|-----------------|-----------------|-----------------|
| <b>CDP-DAG</b> | 0.015124273     | 0.011749767     | 0.019285012     | 0.061940002     | 0.071758957     | 0.057062568     |
| <b>Cer</b>     | 0.19504779      | 0.216785997     | 0.216427253     | 0.13525069      | 0.145915565     | 0.167095614     |
| <b>CL</b>      | 0.77881138      | 0.743802639     | 0.605814161     | 1.487231036     | 1.439300435     | 1.559186908     |
| <b>DAG</b>     | 4.733885827     | 4.809351219     | 6.631319898     | 5.31129097      | 5.052870236     | 6.008994526     |
| <b>EE</b>      | 9.378973625     | 7.659139583     | 6.848938903     | 4.492170416     | 4.882674743     | 4.605306095     |
| <b>IPC</b>     | 2.391301664     | 2.429651712     | 2.499352098     | 1.300103045     | 1.415487249     | 1.30788091      |
| <b>LPA</b>     | 0.023529426     | 0.021304741     | 0.023904182     | 0.03276838      | 0.036603073     | 0.021635286     |
| <b>LPC</b>     | 1.217297138     | 0.826398916     | 0.889906634     | 2.08825827      | 1.950552679     | 1.41228448      |
| <b>LPE</b>     | 1.584314033     | 1.14612861      | 1.304509636     | 2.390386244     | 2.572451363     | 1.657171356     |
| <b>LPI</b>     | 0.714404717     | 0.526081548     | 0.532245947     | 1.205542736     | 1.112771378     | 0.594128886     |
| <b>LPS</b>     | 0.142852185     | 0.11434605      | 0.148918756     | 0.320762159     | 0.290101311     | 0.165582534     |
| <b>M(IP)2C</b> | 2.08817141      | 1.988102502     | 2.274188589     | 2.041487505     | 1.866722978     | 1.690581477     |
| <b>MIPC</b>    | 0.89423054      | 0.931765075     | 0.850490436     | 0.222317598     | 0.246509021     | 0.237545865     |
| <b>PA</b>      | 6.535715277     | 6.471636371     | 6.285671223     | 3.266754283     | 3.613136412     | 4.430742064     |
| <b>PC</b>      | 23.95771941     | 24.73189579     | 22.97986172     | 23.83482202     | 23.48735732     | 24.25011143     |
| <b>PE</b>      | 15.30145732     | 17.04591552     | 15.09712067     | 16.90298023     | 16.87408099     | 17.32373955     |
| <b>PG</b>      | 0.045910979     | 0.052900861     | 0.038828848     | 0.165563234     | 0.154946347     | 0.168681541     |
| <b>PI</b>      | 24.10587236     | 24.13231807     | 26.52705743     | 17.89426951     | 18.05687401     | 17.5725616      |
| <b>PS</b>      | 3.127781865     | 3.01516914      | 3.419682785     | 3.598591137     | 3.268162939     | 2.836670157     |
| <b>TAG</b>     | 2.767598785     | 3.125555886     | 2.806475819     | 13.24751054     | 13.461723       | 13.93303715     |

| CLASS          | rts1_rich_1 | rts1_rich_2 | rts1_rich_3 | rts1_poor_1 | rts1_poor_2 | rts1_poor_3 |
|----------------|-------------|-------------|-------------|-------------|-------------|-------------|
| <b>CDP-DAG</b> | 0.016025331 | 0.014198792 | 0.010587913 | 0.021019738 | 0.025600214 | 0.027505781 |
| <b>Cer</b>     | 0.280340192 | 0.221372089 | 0.243160518 | 0.115787748 | 0.116377667 | 0.117912233 |
| <b>CL</b>      | 0.844501715 | 0.948274934 | 0.840363612 | 1.132031733 | 1.122054682 | 1.149218268 |
| <b>DAG</b>     | 5.127803857 | 7.034695286 | 5.198828694 | 4.562333865 | 6.325619098 | 5.991113596 |
| <b>EE</b>      | 10.1124045  | 8.199667064 | 9.051301832 | 8.145773939 | 8.779257775 | 7.494494854 |
| <b>IPC</b>     | 2.745943574 | 3.110048322 | 2.903497044 | 1.548884377 | 1.788751354 | 1.595724532 |
| <b>LPA</b>     | 0.044632693 | 0.030139882 | 0.045795706 | 0.030128313 | 0.039659988 | 0.026353854 |
| <b>LPC</b>     | 0.775631933 | 0.870077412 | 0.88132764  | 0.709663238 | 0.926305986 | 0.992357436 |
| <b>LPE</b>     | 1.106821638 | 1.275594031 | 1.385974881 | 0.708876185 | 0.826711635 | 0.930619317 |
| <b>LPI</b>     | 0.397680778 | 0.464885809 | 0.442515584 | 0.388851541 | 0.389640783 | 0.462858097 |
| <b>LPS</b>     | 0.115524862 | 0.135004173 | 0.139278644 | 0.062781953 | 0.057729648 | 0.098859205 |
| <b>M(IP)2C</b> | 1.932215515 | 1.821682117 | 1.845984158 | 0.731721335 | 0.993487451 | 0.989315493 |
| <b>MIPC</b>    | 0.722725697 | 0.61744993  | 0.622305373 | 0.641922963 | 0.533776305 | 0.638632773 |
| <b>PA</b>      | 4.682071952 | 5.890505732 | 5.333530954 | 4.293771431 | 5.103627931 | 3.866771315 |
| <b>PC</b>      | 24.57213488 | 23.25469862 | 23.9317439  | 20.67486868 | 19.9990548  | 20.29573708 |
| <b>PE</b>      | 17.5741617  | 16.9000702  | 16.71286943 | 14.86874164 | 15.86478327 | 15.36138678 |
| <b>PG</b>      | 0.059617614 | 0.058242452 | 0.063838251 | 0.177553402 | 0.169761597 | 0.150251213 |
| <b>PI</b>      | 21.75955942 | 22.76402065 | 23.79778174 | 16.22900003 | 15.86431373 | 16.86328793 |
| <b>PS</b>      | 2.98673712  | 2.836810144 | 2.949816326 | 1.608225168 | 1.466521141 | 1.835116456 |
| <b>TAG</b>     | 4.14346504  | 3.552562361 | 3.599497803 | 23.34806272 | 19.60696495 | 21.11248377 |

mol % of sample from 3 independent experiments are shown

| Subspecies | wildtype_rich_1 | wildtype_rich_2 | wildtype_rich_3 | wildtype poor_1 | wildtype poor_2 | wildtype poor_3 |
|------------|-----------------|-----------------|-----------------|-----------------|-----------------|-----------------|
| Cer 32:0;2 | 0.009164588     | 0.013071325     | 0.009405691     |                 | 0.004879923     |                 |
| Cer 34:0;2 | 0.010381844     | 0.016344926     | 0.012457434     | 0.00416234      | 0.005571384     | 0.003819645     |
| Cer 34:1;4 |                 | 0.002476532     | 0.002270297     |                 |                 |                 |
| Cer 36:0;2 |                 | 0.010239279     | 0.007803667     |                 |                 |                 |
| Cer 36:1;2 |                 | 0.010908625     | 0.010367526     |                 |                 |                 |
| Cer 38:0;2 |                 | 0.00262842      |                 |                 |                 |                 |
| Cer 38:1;4 |                 |                 |                 |                 |                 | 0.002433089     |
| Cer 42:0;2 | 0.008755563     | 0.010327517     | 0.010099323     | 0.007640132     | 0.007567534     | 0.008981505     |
| Cer 42:0;3 | 0.003592769     | 0.003993989     | 0.005537414     |                 |                 |                 |
| Cer 42:0;4 | 0.00594568      | 0.006217118     | 0.008578033     | 0.005415144     | 0.004887574     | 0.00457524      |
| Cer 44:0;2 |                 | 0.004775292     | 0.00532616      |                 |                 |                 |
| Cer 44:0;3 | 0.015204608     | 0.022480801     | 0.031077972     | 0.007443617     | 0.007756783     | 0.010394852     |
| Cer 44:0;4 | 0.109735079     | 0.089055029     | 0.090513329     | 0.079414936     | 0.080402373     | 0.092704837     |
| Cer 44:0;5 | 0.007933973     | 0.004250016     | 0.004393248     | 0.009794445     | 0.010964138     | 0.011593244     |
| Cer 46:0;3 | 0.003013183     | 0.005204565     | 0.006231262     |                 |                 | 0.004727654     |
| Cer 46:0;4 | 0.021320503     | 0.014812564     | 0.012365897     | 0.021380076     | 0.023885856     | 0.027865548     |
| IPC 38:0;3 |                 |                 | 0.010530804     |                 |                 |                 |
| IPC 40:1;2 |                 |                 |                 |                 |                 |                 |
| IPC 42:0;3 | 0.037752615     | 0.081038545     | 0.111988134     |                 |                 |                 |
| IPC 42:0;4 | 0.099194621     | 0.121570846     | 0.126779359     | 0.050075057     | 0.047371173     | 0.049949911     |
| IPC 42:0;5 |                 |                 |                 |                 |                 |                 |
| IPC 44:0;3 | 0.416332229     | 0.675371582     | 0.886379871     | 0.099791142     | 0.108332236     | 0.11564565      |
| IPC 44:0;4 | 1.31522871      | 1.166132026     | 1.046990449     | 0.653766056     | 0.703536979     | 0.667871561     |
| IPC 44:0;5 | 0.245932918     | 0.172176266     | 0.156118574     | 0.212339755     | 0.230622176     | 0.203696064     |
| IPC 46:0;3 | 0.050422599     | 0.058607611     | 0.056996173     | 0.023727966     | 0.028610923     | 0.025521929     |
| IPC 46:0;4 | 0.226437972     | 0.154754837     | 0.103568734     | 0.241579885     | 0.276608811     | 0.228595006     |
| IPC 46:0;5 |                 |                 |                 | 0.018823185     | 0.020404951     | 0.016600789     |

| <b>Subspecies</b> | <b>wildtype_rich_1</b> | <b>wildtype_rich_2</b> | <b>wildtype_rich_3</b> | <b>wildtype poor_1</b> | <b>wildtype poor_2</b> | <b>wildtype poor_3</b> |
|-------------------|------------------------|------------------------|------------------------|------------------------|------------------------|------------------------|
| M(IP)2C 42:0;3    | 0.006920721            |                        | 0.008485232            |                        |                        |                        |
| M(IP)2C 42:0;4    |                        |                        | 0.00774717             |                        |                        |                        |
| M(IP)2C 44:0;3    | 0.333417021            | 0.518899034            | 0.733055509            | 0.087620063            | 0.073370433            | 0.069791774            |
| M(IP)2C 44:0;4    | 1.12699082             | 1.061241443            | 1.147719766            | 1.064284315            | 0.958711416            | 0.877557992            |
| M(IP)2C 44:0;5    | 0.011947467            | 0.007556794            |                        | 0.022301417            | 0.025028135            | 0.020421436            |
| M(IP)2C 46:0;3    | 0.156480521            | 0.139846616            | 0.162966471            | 0.082754414            | 0.063578613            | 0.063279793            |
| M(IP)2C 46:0;4    | 0.45241486             | 0.260558615            | 0.214214441            | 0.784527296            | 0.746034381            | 0.659530482            |
| MIPC 42:0;3       | 0.020580554            | 0.014834466            | 0.016630463            |                        |                        |                        |
| MIPC 44:0;3       | 0.099971019            | 0.166216788            | 0.197545327            |                        |                        |                        |
| MIPC 44:0;4       | 0.526966399            | 0.571843015            | 0.500872853            | 0.140649053            | 0.149844899            | 0.137703176            |
| MIPC 44:0;5       | 0.016272151            |                        |                        |                        |                        | 0.012220267            |
| MIPC 46:0;3       | 0.038882444            | 0.045327589            | 0.040626185            |                        |                        |                        |
| MIPC 46:0;4       | 0.191557975            | 0.133543217            | 0.094815608            | 0.081668546            | 0.096664123            | 0.087622422            |

| <b>Subspecies</b> | <b>rts1_rich_1</b> | <b>rts1_rich_2</b> | <b>rts1_rich_3</b> | <b>rts1_poor_1</b> | <b>rts1_poor_2</b> | <b>rts1_poor_3</b> |
|-------------------|--------------------|--------------------|--------------------|--------------------|--------------------|--------------------|
| Cer 32:0;2        | 0.012293833        | 0.010781104        | 0.007950254        |                    |                    |                    |
| Cer 34:0;2        | 0.018860939        | 0.012933109        | 0.009771402        | 0.003607964        | 0.001843059        | 0.001575535        |
| Cer 34:1;4        |                    | 0.002558534        | 0.002831267        | 0.001910334        | 0.002080632        |                    |
| Cer 36:0;2        | 0.013332447        | 0.007755114        |                    |                    |                    |                    |
| Cer 36:1;2        | 0.012271606        |                    |                    |                    |                    |                    |
| Cer 38:0;2        | 0.002766947        | 0.002439249        | 0.001834177        |                    |                    |                    |
| Cer 38:1;4        |                    |                    |                    | 0.002647406        | 0.002467465        | 0.002646703        |
| Cer 42:0;2        | 0.012834836        | 0.009443056        | 0.011229431        | 0.0054903          | 0.005724272        | 0.004902899        |
| Cer 42:0;3        | 0.004824466        | 0.00484276         | 0.005600848        |                    | 0.002528104        | 0.001952665        |
| Cer 42:0;4        | 0.009446953        | 0.009112872        | 0.010336566        |                    | 0.002242499        | 0.0016957          |
| Cer 44:0;2        |                    |                    | 0.006180718        |                    |                    |                    |
| Cer 44:0;3        | 0.018724385        | 0.024070845        | 0.026164673        | 0.009921159        | 0.008433742        | 0.011517226        |
| Cer 44:0;4        | 0.130850759        | 0.106841818        | 0.124992039        | 0.049604189        | 0.05193812         | 0.049666568        |
| Cer 44:0;5        | 0.011037522        | 0.009114402        | 0.009089479        | 0.007615583        | 0.010235914        | 0.008566725        |
| Cer 46:0;3        | 0.006345525        | 0.005401145        | 0.006071708        | 0.00854155         | 0.005531892        | 0.0084988          |
| Cer 46:0;4        | 0.026749972        | 0.016078082        | 0.021107957        | 0.026449262        | 0.023351968        | 0.026889412        |
| IPC 38:0;3        |                    | 0.01822891         | 0.009619842        |                    |                    |                    |
| IPC 40:1;2        |                    |                    |                    |                    | 0.01176804         |                    |
| IPC 42:0;3        | 0.048320919        | 0.095878491        | 0.066227736        |                    |                    |                    |
| IPC 42:0;4        | 0.144439088        | 0.163560716        | 0.167181498        | 0.030770788        | 0.034851624        | 0.026762686        |
| IPC 42:0;5        | 0.008012081        | 0.010428942        | 0.009710443        |                    |                    |                    |
| IPC 44:0;3        | 0.432704697        | 0.774391106        | 0.591103269        | 0.144973437        | 0.166477372        | 0.172092705        |
| IPC 44:0;4        | 1.464788795        | 1.477555892        | 1.466197513        | 0.572607663        | 0.72076572         | 0.597559483        |
| IPC 44:0;5        | 0.314188382        | 0.297764619        | 0.31023852         | 0.277481038        | 0.358734092        | 0.280016219        |
| IPC 46:0;3        | 0.062196386        | 0.073208079        | 0.06442124         | 0.068864411        | 0.053288515        | 0.064851018        |
| IPC 46:0;4        | 0.271293227        | 0.199031566        | 0.218796983        | 0.403368323        | 0.385042421        | 0.401748024        |
| IPC 46:0;5        |                    |                    |                    | 0.050818716        | 0.057823571        | 0.052694397        |

| <b>Subspecies</b> | <b>rts1_rich_1</b> | <b>rts1_rich_2</b> | <b>rts1_rich_3</b> | <b>rts1_poor_1</b> | <b>rts1_poor_2</b> | <b>rts1_poor_3</b> |
|-------------------|--------------------|--------------------|--------------------|--------------------|--------------------|--------------------|
| M(IP)2C 42:0;3    |                    |                    |                    |                    |                    |                    |
| M(IP)2C 42:0;4    |                    |                    |                    |                    |                    |                    |
| M(IP)2C 44:0;3    | 0.332041331        | 0.406584675        | 0.389101374        | 0.07123383         | 0.081216075        | 0.086078726        |
| M(IP)2C 44:0;4    | 1.020168622        | 0.95275006         | 0.978585319        | 0.321728617        | 0.431817317        | 0.42466967         |
| M(IP)2C 44:0;5    | 0.010764628        | 0.007269833        |                    | 0.004400627        | 0.008121321        |                    |
| M(IP)2C 46:0;3    | 0.160371366        | 0.162669391        | 0.157080854        | 0.06728163         | 0.080698652        | 0.086725175        |
| M(IP)2C 46:0;4    | 0.408869568        | 0.292408159        | 0.32121661         | 0.26707663         | 0.391634086        | 0.391841922        |
| MIPC 42:0;3       |                    |                    |                    |                    |                    |                    |
| MIPC 44:0;3       | 0.071973238        | 0.090082782        | 0.074395448        | 0.030872097        | 0.027578679        | 0.03378951         |
| MIPC 44:0;4       | 0.423890417        | 0.366007761        | 0.397084458        | 0.278290016        | 0.232340344        | 0.266037998        |
| MIPC 44:0;5       | 0.016537938        | 0.013776811        |                    | 0.013733685        | 0.01858219         | 0.014598907        |
| MIPC 46:0;3       | 0.033486599        | 0.03392072         | 0.031194051        | 0.047446151        | 0.03559827         | 0.047954497        |
| MIPC 46:0;4       | 0.176837505        | 0.113661856        | 0.119631416        | 0.271581014        | 0.219676822        | 0.276251861        |
