# Supplementary material
Source: PubMed Central journal article supplement (PMC5787035)
Supplement: NIHMS926004-supplement-2.pdf [file NIHMS926004-supplement-2.pdf]

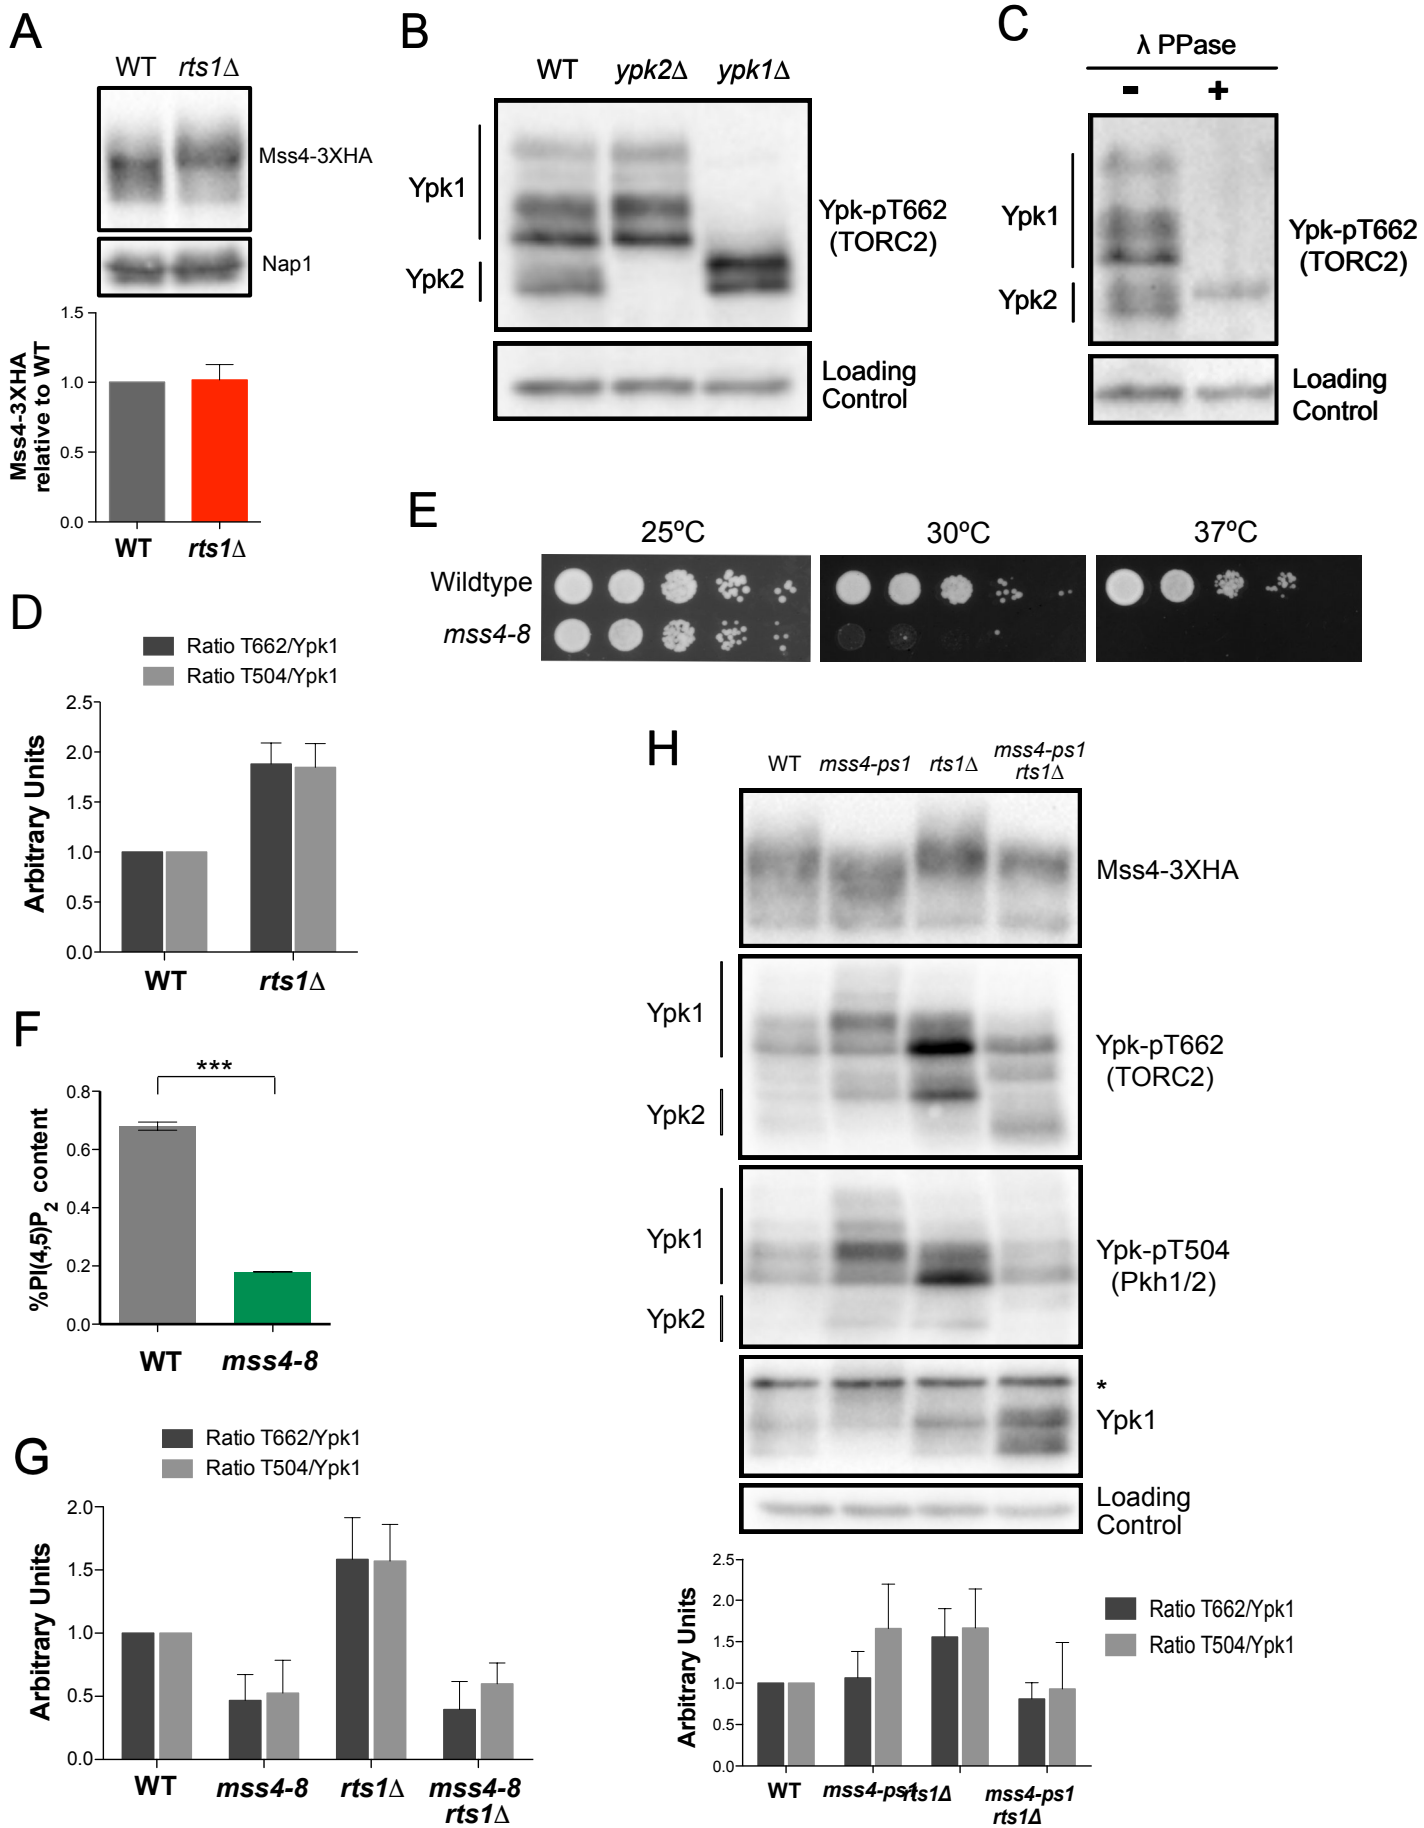

**Figure S1 PP2A<sup>Rts1</sup> controls the TORC2 signaling network via Mss4, a PI(4)P kinase. Related to Figure 1 and Table S1.**

**(A)** Quantification of Mss4-3XHA levels in WT and *rts1* $\Delta$  cells. Mss4-3XHA was quantified relative to a loading control. **(B)** Characterization of a phosphospecific antibody that recognizes TORC2-dependent phosphorylation of Ypk1 and Ypk2. Extracts from wildtype, *ypk1* $\Delta$  and *ypk2* $\Delta$  cells were analyzed by western blot to detect a TORC2-dependent phosphorylation site on Ypk1 and Ypk2. The antibody detects phosphorylated T662 in Ypk1 and a related site in Ypk2. **(C)** Extracts from wildtype cells were treated with lambda-phosphatase and Ypk-pT662 phosphorylation was assayed by western blot. **(D)** Quantification of TORC2- and Pkh1/2-dependent phosphorylation of Ypk1/2 in wild type and *rts1* $\Delta$  cells. All phosphorylation forms of Ypk1/2 were included in the quantification. Quantification represents the average of 3 biological replicates. Error bars represent the standard deviation of the mean. **(E)** Characterization of a new temperature-sensitive allele of *MSS4*. A series of 10-fold dilutions of wild type and *mss4-8* cells were grown at 25°C, 30°C and 37°C on YPD. **(F)** Bar plots showing levels of PI(4,5)P<sub>2</sub> in wildtype and *mss4-8* cells grown to early log phase in YPD medium at 25°C, which is a semi-restrictive temperature. PI(4,5)P<sub>2</sub> was quantified as the percentage of anionic phospholipids. Error bars represent the standard deviation of the mean of two biological replicates. \*\*\* denotes p= 0.0002 in Student's t-test. **(G)** Quantification of TORC2- and Pkh1/2-dependent phosphorylation of Ypk1/2 in wild type, *mss4-8*, *rts1* $\Delta$  and *mss4-8 rts1* $\Delta$  cells. All phosphorylation forms of Ypk1/2 were included in the quantification. Quantification represents the average of 3 biological replicates. Error bars represent the standard deviation of the mean. **(H)** Cells of the indicated genotypes were grown overnight to early log phase at 22°C in YPD medium. Western blotting was used to detect Mss4-3XHA, as well as TORC2- and Pkh1/2-dependent phosphorylation of Ypk1/2. Total Ypk1 was detected using an anti-Ypk1 antibody. The asterisk indicates a non-specific band.

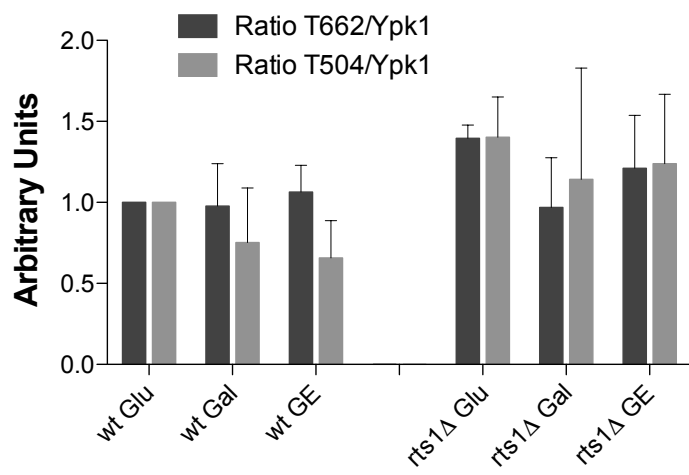

**Figure S2: The TORC2 network is modulated by nutrients. Related to Figure 2 and Table S1.**

Quantification of TORC2- and Pkh1/2-dependent phosphorylation of Ypk1/2 in wild type and *rts1* $\Delta$  cells growing in different carbon sources. All phosphorylation forms of Ypk1/2 were included in the quantification. Quantification represents the average of 3 biological replicates.

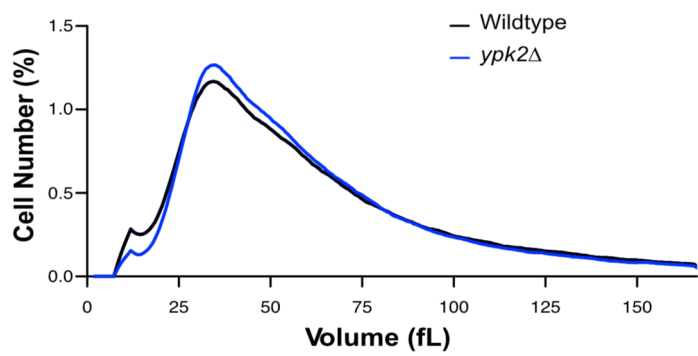

**Figure S3: *ypk2*Δ has no effect on cell size. Related to Figure 3 and Table S1.**  
Cells of the indicated genotypes were grown to log phase at 22°C in YPD and cell size distributions were determined using a Coulter counter.

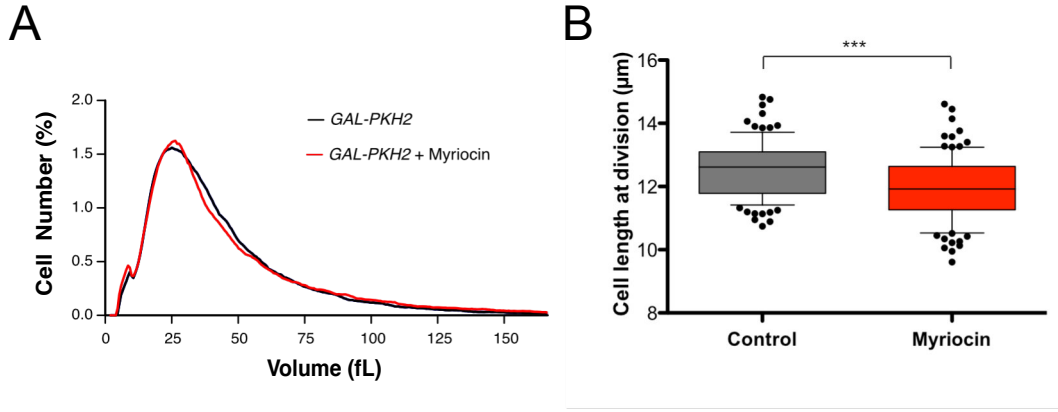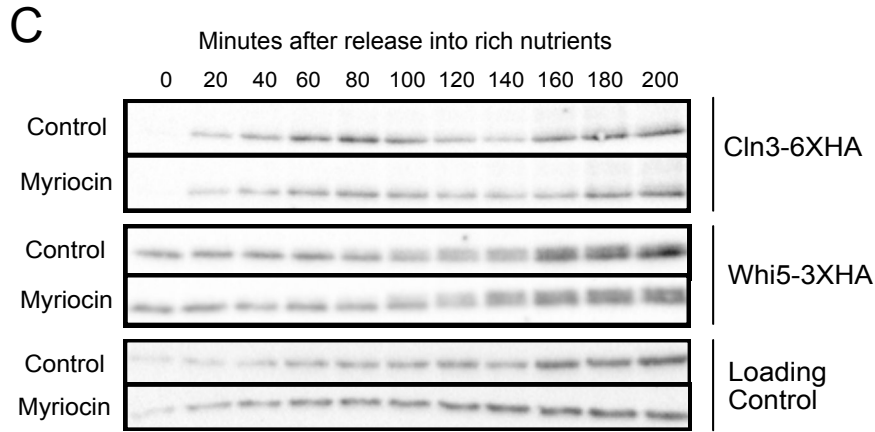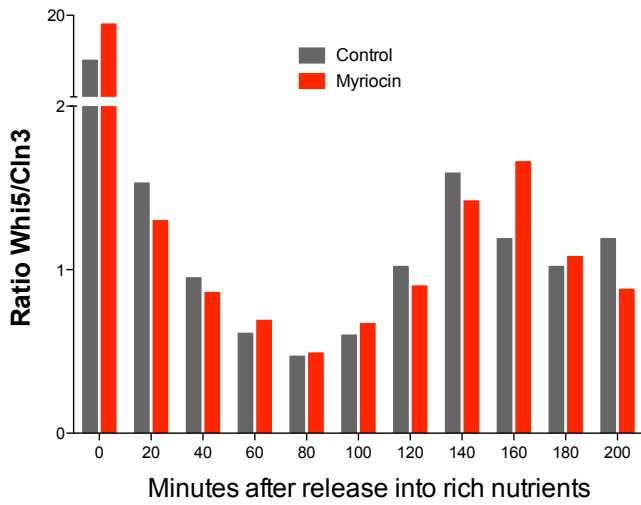

**Figure S4: Ceramides are required for normal control of cell size. Related to Figure 4 and Table S1.**

**(A)** Overexpression of PKH2 suppresses effects of myriocin on cell size. *GAL1-PKH2* cells were grown in YPGal medium at 22°C for 16 hours to early log phase with or without 0.4 µg/ml myriocin. Cell size distributions were determined using a Coulter counter. **(B)** Myriocin causes reduced cell size in fission yeast. Cell length at division of wildtype fission yeast cells grown for 16 hours at 22°C in the presence or absence of 0.3 µg/ml myriocin. Boxes are delimited by the 25-75% of the data and the central lines indicate the median. Whiskers mark maximum and minimum values within a 10-90% range of the data; individual dots represent cells outside the range. \*\*\* indicates a p-value of 0.0001 in Student's t-test **(C)** Myriocin does not cause changes in Whi5 or Cln3 protein levels during G1 phase. Cells were grown to early log phase in YPG/E medium. Small unbudded cells were isolated by centrifugal elutriation and were released into YPD medium with or without 1 µg/ml myriocin at 25°C. Samples were taken at 20 minute intervals and Cln3-6XHA and Whi5-3XHA were assayed by western blot. We consistently observed that cells carrying Cln3-6XHA and Whi5-3XHA budded prematurely at a reduced volume, which suggests that the tags cause a slight perturbation of function. The lower panel shows quantification of the ratio of the Whi5 signal over the Cln3 signal.



**A**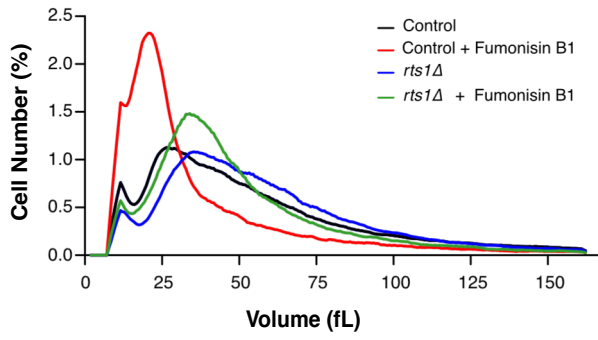**B**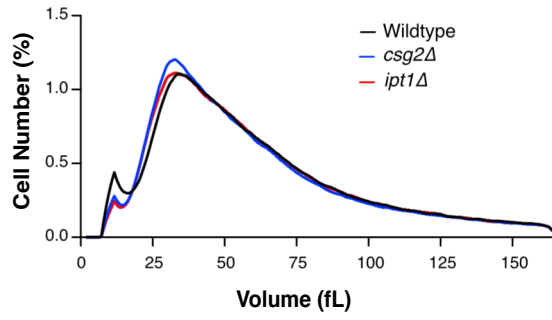**C**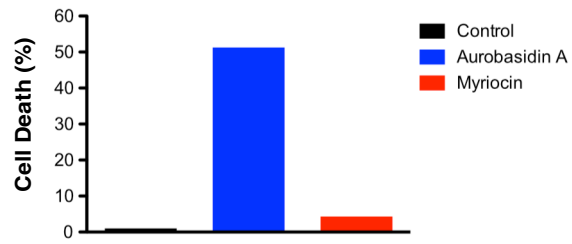

**Figure S5: Blocking synthesis of complex sphingolipids does not cause effects on cell size. Related to Figure 5 and Table S1.**

**(A)** Cells of the indicated genotypes were grown for 16 hours in complete synthetic media with 200  $\mu$ M fumonisin B1 or methanol control and cell size distributions were determined using a Coulter counter. All strains included *yor1* $\Delta$ , which increases sensitivity to the drug by reducing transporter-mediated drug efflux. **(B)** Cells of the indicated genotypes were grown to log phase in YPD at 22°C and cell size distributions were determined using a Coulter counter. *Csg2* is required for production of normal levels of MIPC and *lpt1* is required for production of  $M(IP)_2C$ . **(B)** Wildtype cells were grown to log phase at 22°C in YPD medium or YPD medium containing 12.5 ng/ml Aureobasidin A or 1  $\mu$ g/ml myriocin. Cell viability was determined by trypan blue exclusion assay.

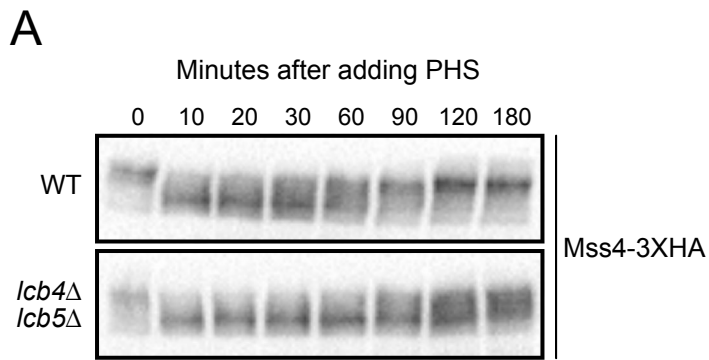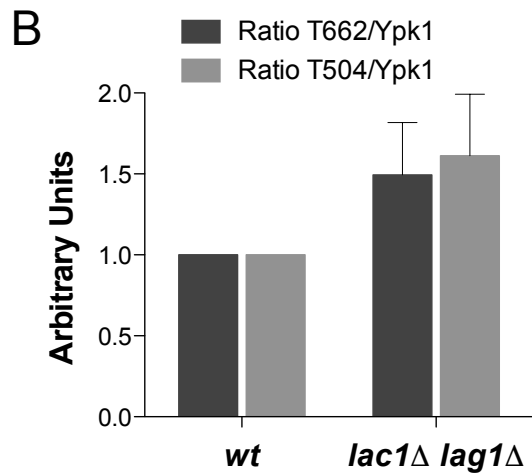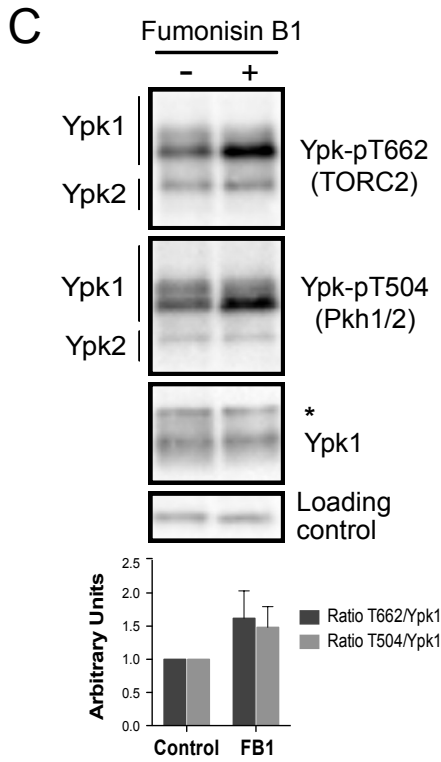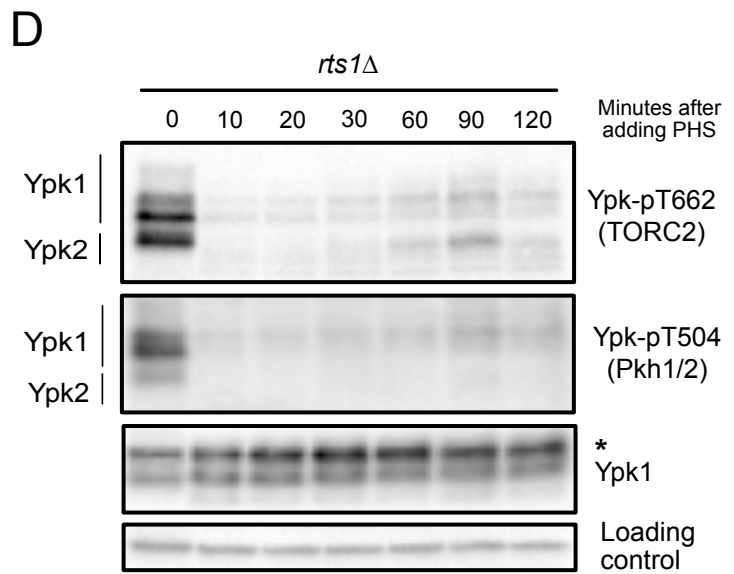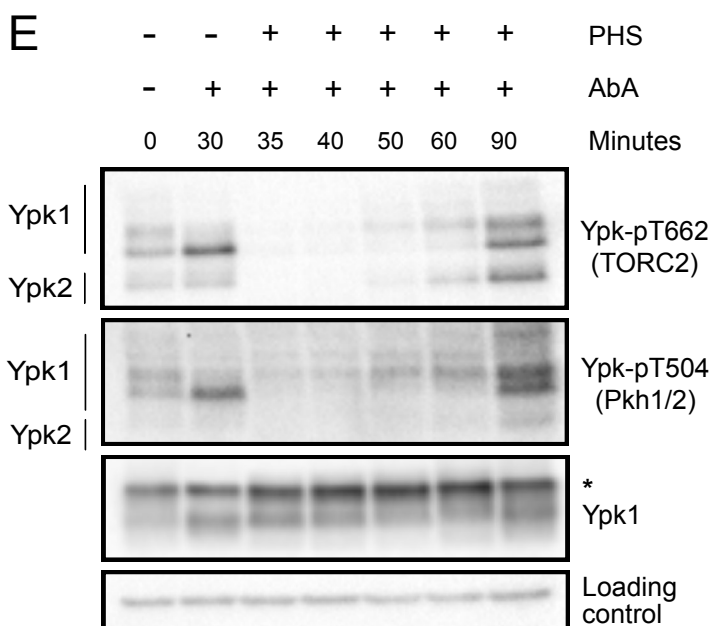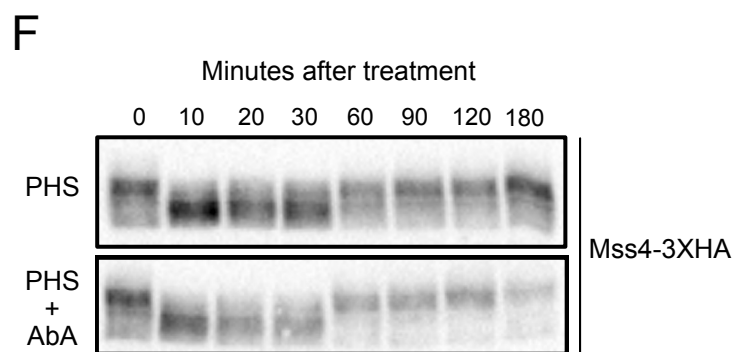

**Figure S6: Phytosphingosine must be converted to ceramides to influence TORC2 network signaling. Related to Figure 6 and Table S1.**

**(A)** Wildtype and *lcb4* $\Delta$  *lcb5* $\Delta$  cells were grown to early log phase at 22°C in YPD medium. 20  $\mu$ M phytosphingosine (PHS) was added to each culture followed by incubation at 25°C. Samples were taken at the indicated times and Mss4-3XHA was detected by western blot. Lcb4/5 are required for phosphorylation of long chain bases. **(B)** Quantification of TORC2- and Pkh1/2-dependent phosphorylation of Ypk1/2 in wild type and *lac1* $\Delta$  *lag1* $\Delta$  cells. All phosphorylation forms of Ypk1/2 were included in the quantification. Quantification represents the average of 3 biological replicates. Error bars represent the standard deviation of the mean. **(C)** *yor1* $\Delta$  cells were grown to early log phase in complete synthetic media at 22°C. Samples were taken 90 minutes after addition of 200  $\mu$ M of fumonisin B1 or methanol control. **(D)** *rts1* $\Delta$  cells were grown to early log phase in YPD at 22°C. Samples were taken at the indicated times after addition of 20  $\mu$ M phytosphingosine (PHS) and TORC2- and Pkh1/2-dependent phosphorylation of Ypk1/2 were assayed by western blot. Total Ypk1 protein levels were assayed with an anti-Ypk1 antibody. **(E)** Wildtype cells were grown to early log phase in YPD and 0.5  $\mu$ g/ml Aureobasidin A (AbA) was added to the cultures followed by 30 min incubation at 25°C to allow time for depletion of IPC. After this time, 20  $\mu$ M phytosphingosine (PHS) was added. Samples were taken at the indicated times and western blotting with phosphospecific antibodies was used to detect a TORC2-dependent phosphorylation site (Ypk-pT662) and a Pkh1/2-dependent site (Ypk-pT504) on Ypk1/2. Total Ypk1 was detected using an anti-Ypk1 antibody. **(F)** Wildtype cells were grown to early log phase in YPD medium. 20  $\mu$ M phytosphingosine (PHS) or 20  $\mu$ M phytosphingosine and 0.5  $\mu$ g/ml Aureobasidin A (AbA) were added to the cultures, followed by incubation at 25°C. Samples were taken at the indicated times and Mss4-3XHA was detected by western blot.

**A**

**Rich Nutrients**

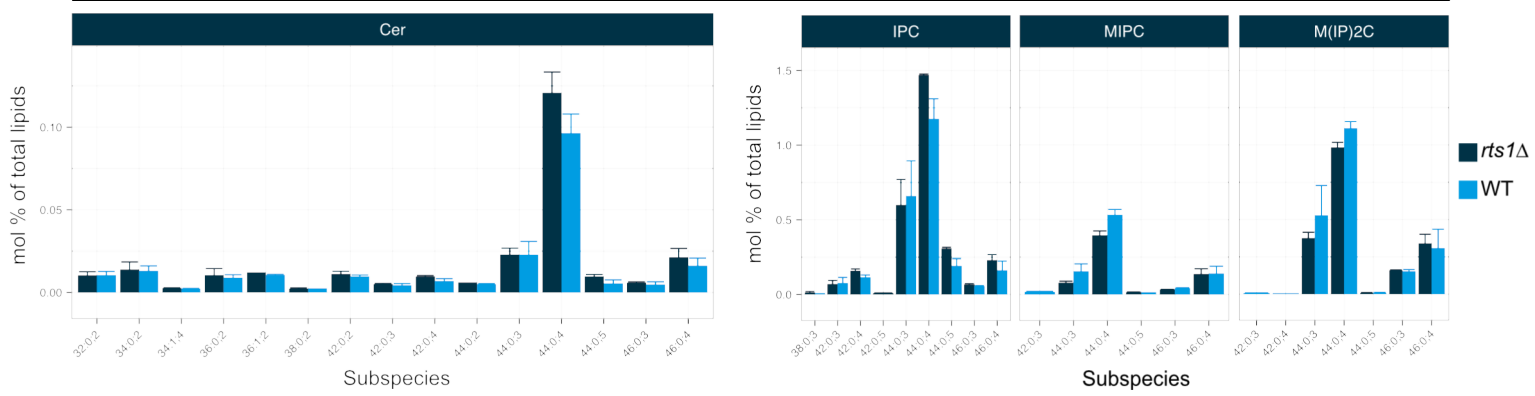

**Poor Nutrients**

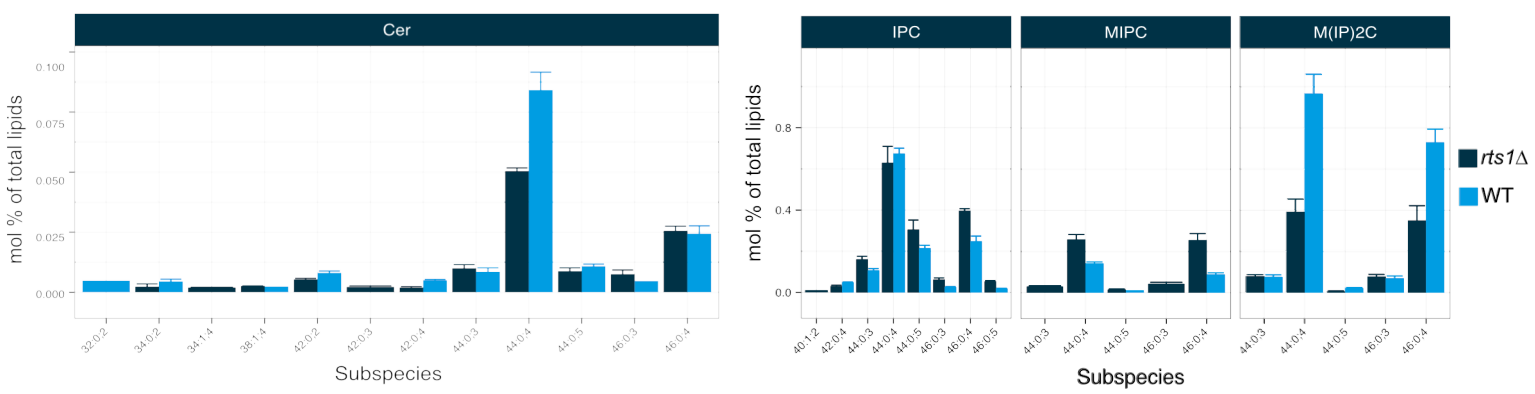

**B**

**Rich Nutrients**

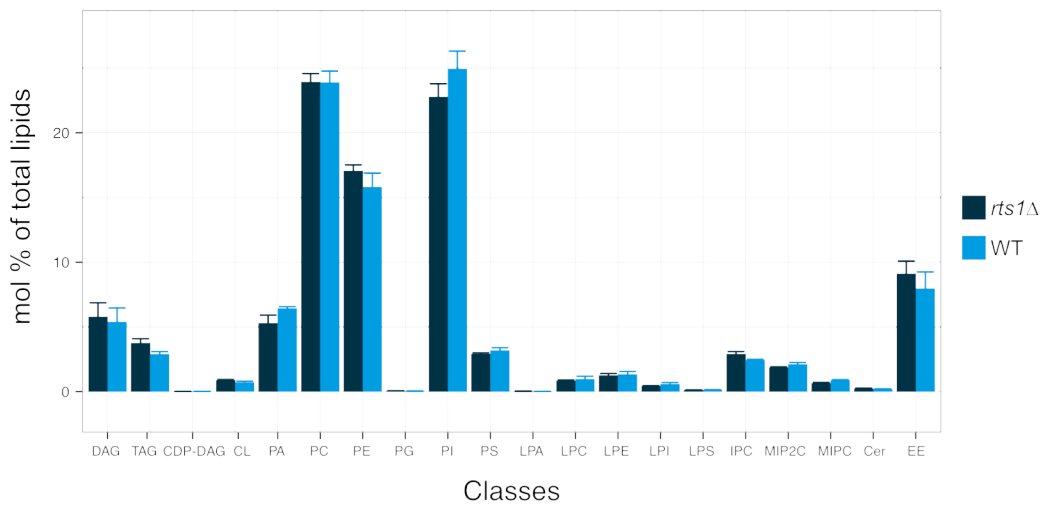

**Poor Nutrients**

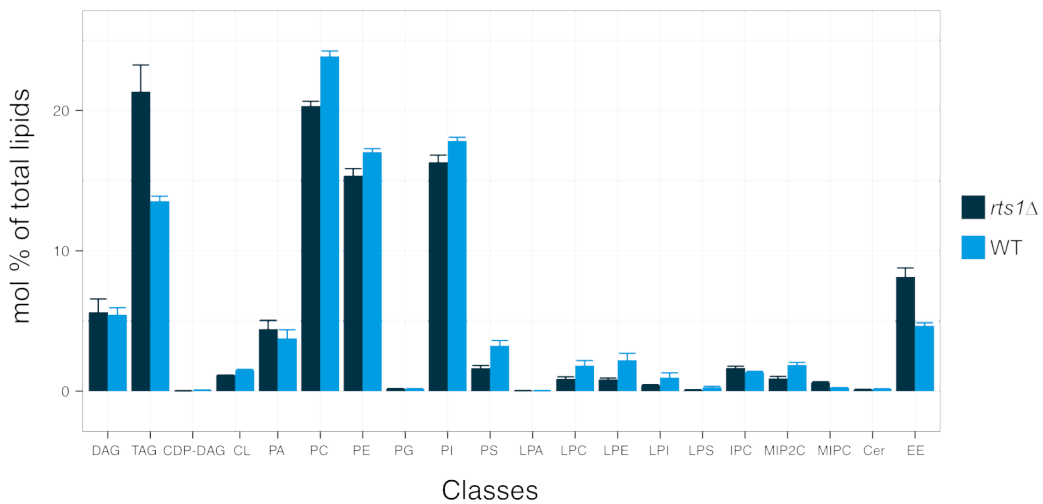

**Figure S7: Levels of ceramides and complex sphingolipids are modulated by carbon source and PP2A<sup>Rts1</sup>. Related to Figure 7, Table S1 and Data S1.**

**(A)** Quantification of subspecies of ceramides, IPC, MIPC and M(IP)<sub>2</sub>C in wild type and *rts1*Δ cells growing in rich or poor carbon. **(B)** Quantification of the lipid classes in wild type and *rts1*Δ cells growing in rich or poor carbon.

| Strain | MAT | Genotype                                                                                                 | Source     |
|--------|-----|----------------------------------------------------------------------------------------------------------|------------|
| DK186  | a   | <i>bar1</i>                                                                                              | [S1]       |
| DK647  | a   | <i>bar1 rts1Δ::kanMX6</i>                                                                                | [S2]       |
| DK2326 | a   | <i>bar1 MSS4-3xHA::HisMX6</i>                                                                            | This study |
| DK2342 | a   | <i>bar1 MSS4-3xHA::HisMX6 rts1Δ::kanMX6</i>                                                              | This study |
| DK3157 | a   | <i>bar1 MSS4-GFP::HisMX6 SPC42:mRuby2::KanMX6</i>                                                        | This study |
| DK2862 | a   | <i>ba1 MSS4-GFP::HisMX6 rts1Δ::KanMX6</i>                                                                | This study |
| DK2925 | a   | <i>bar1 mss4-8::HisMX6</i>                                                                               | This study |
| DK2967 | a   | <i>bar1 mss4-8::HisMX6 rts1Δ::KanMX6</i>                                                                 | This study |
| DK3116 | a   | <i>bar1 ypk1Δ::HisMX6</i>                                                                                | This study |
| DK3158 | a   | <i>bar1 ypk1Δ::HisMX6 rts1Δ::KanMX6</i>                                                                  | This study |
| DK1523 | a   | <i>bar1 pkh1-D398G pkh2Δ::LEU2 CLN2-3xHA::ADE2</i><br><i>bar1 pkh1-D398G pkh2Δ::LEU2 CLN2-3xHA::ADE2</i> | This study |
| DK1721 | a   | <i>rts1Δ::HIS</i>                                                                                        | This study |
| DK3092 | a   | <i>bar1 CLN3-6xHA::HIS WHI5-3xHA::hphNT1</i>                                                             | This study |
| DK3267 | a   | <i>bar1 lag1Δ::kanMX6 lac1Δ::HIS</i>                                                                     | This study |
| DK3268 | a   | <i>bar1 lag1Δ::kanMX6 lac1Δ::HIS MSS4-3xHA::TRP</i>                                                      | This study |
| DK2546 | a   | <i>bar1 ypk2Δ::His3</i>                                                                                  | This study |
| DK2758 | a   | <i>bar1 GAL1-3xHA-PKH2::URA</i>                                                                          | This study |
| DK2759 | a   | <i>bar1 GAL1-3xHA-PKH1::URA</i>                                                                          | This study |
| DK1037 | h-  | 972                                                                                                      | Paul Nurse |
| DK3184 | a   | <i>bar1 csg2Δ::KanMX6</i>                                                                                | This study |
| DK3186 | a   | <i>bar1 ipt1Δ::KanMX6</i>                                                                                | This study |
| DK3216 | a   | <i>bar1 MSS4-3xHA::HisMX6 lcb4Δ::NatNT2 lcb5Δ::KanMX6</i>                                                | This study |
| DK3108 | a   | <i>bar1 MSS4-ps1-3xHA::HisMX6</i>                                                                        | This study |
| DK3127 | a   | <i>bar1 MSS4-ps1-3xHA::HisMX6 rts1Δ::kanMX6</i>                                                          | This study |
| DK3190 | a   | <i>bar1 yor1Δ::kanMX6</i>                                                                                | This study |
| DK3476 | a   | <i>bar1 yor1Δ::kanMX6 rts1Δ::NatNT2</i>                                                                  | This study |

**Table S1: Yeast strains used in this study. Related to Figures 1-7 and S1-7.**

### **Supplemental References**

- S1. Altman, R., and Kellogg, D. (1997) Control of mitotic events by Nap1 and the Gin4 kinase. *The Journal of Cell Biology*. 138, 119–130
- S2. Artiles, K., Anastasia, S., McCusker, D., and Kellogg, D. R. (2009) The Rts1 regulatory subunit of protein phosphatase 2A is required for control of G1 cyclin transcription and nutrient modulation of cell size. *PLoS Genet*. 5, e1000727
